# Supplementary material for: Reimmunization increases contraceptive effectiveness of gonadotropin-releasing hormone vaccine (GonaCon-Equine) in free-ranging horses (Equus caballus): Limitations and side effects
Source: PubMed Central journal article supplement (PMC6067756; doi:10.1371/journal.pone.0201570), 2018-07-31
Supplement: pone.0201570.s001.pdf [file pone.0201570.s001.pdf]

**S1 Table.** Comparative metrics and pregnancy proportions, by age class, for treatment and control groups of free-ranging mares selected for this experiment.

2009

| Criteria                     | GonaCon-Equine |           | Control      |           |
|------------------------------|----------------|-----------|--------------|-----------|
| <b>Total sample size (n)</b> | 29             |           | 28           |           |
| 2 yr                         | 5              |           | 6            |           |
| 3-4 yr                       | 9              |           | 9            |           |
| 5-10 yr                      | 13             |           | 11           |           |
| >10 yr                       | 2              |           | 2            |           |
| <b>Body condition score:</b> | Mean           | 95% CI    | Mean         | 95% CI    |
| 2 yr                         | 4.8            | 3.6-5.9   | 4.7          | 4.3-5.1   |
| 3-4 yr                       | 5.1            | 4.6-5.6   | 5.0          | 4.3-5.7   |
| 5-10 yr                      | 5.5            | 5.2-5.9   | 5.1          | 4.6-6.5   |
| >10 yr                       | 5.0            | 4.2-6.5   | 5.5          | 4.5-6.5   |
| <b>Body weight (kg):</b>     |                |           |              |           |
| 2 yr                         | 350            | 300-399   | 357          | 226-487   |
| 3-4 yr                       | 438            | 407-468   | 411          | 379-442   |
| 5-10 yr                      | 428            | 381-475   | 462          | 434-489   |
| >10 yr                       | 455            | 369-540   | 471          | 458-483   |
| <b>Pregnancy proportion:</b> |                |           |              |           |
| 2 yr                         | 0.8 (4/5)      | 0.49-1.00 | 0.67 (4/6)   | 0.35-0.94 |
| 3-4 yr                       | 0.89 (8/9)     | 0.58-1.00 | 0.89 (8/9)   | 0.59-1.00 |
| 5-10 yr                      | 0.92 (12/13)   | 0.77-1.00 | 0.91 (10/11) | 0.53-1.00 |
| >10 yr                       | 1.00 (2/2)     | 0.34-1.00 | 1.00 (2/2)   | 0.34-1.00 |

|                |              |           |              |           |
|----------------|--------------|-----------|--------------|-----------|
| <b>Overall</b> | 0.86 (25/29) | 0.71-0.95 | 0.85 (24/28) | 0.70-0.95 |
|----------------|--------------|-----------|--------------|-----------|

**2013**

| <b>Criteria</b>              | <b>GonaCon-Equine</b> |           | <b>Control</b> |           |
|------------------------------|-----------------------|-----------|----------------|-----------|
| <b>Total sample size (n)</b> | 25                    |           | 26             |           |
| <b>6-8 yr</b>                | 13                    |           | 14             |           |
| <b>9-12 yr</b>               | 7                     |           | 6              |           |
| <b>&gt;12 yr</b>             | 5                     |           | 6              |           |
| <b>Body condition score:</b> | Mean                  | 95% CI    | Mean           | 95% CI    |
| <b>6-8 yr</b>                | 5.3                   | 4.7-5.5   | 5.1            | 4.7-5.5   |
| <b>9-12 yr</b>               | 5.7                   | 4.8-6.2   | 5.7            | 5.0-6.3   |
| <b>&gt;12 yr</b>             | 5.2                   | 4.5-5.9   | 5.4            | 4.8-6.0   |
| <b>Body weight (kg):</b>     |                       |           |                |           |
| <b>6-8 yr</b>                | 455                   | 422-487   | 427            | 403-452   |
| <b>9-12 yr</b>               | 451                   | 404-499   | 459            | 404-513   |
| <b>&gt;12 yr</b>             | 450                   | 381-516   | 427            | 354-499   |
| <b>Pregnancy proportion:</b> |                       |           |                |           |
| <b>6-8 yr</b>                | 0.92 (12/13)          | 0.67-0.92 | 0.86 (12/14)   | 0.60-1.00 |
| <b>9-12 yr</b>               | 0.86 (6/7)            | 0.49-0.97 | 0.89 (8/9)     | 0.59-1.00 |
| <b>&gt;12 yr</b>             | 1.00 (5/5)            | 0.56-1.00 | 1.00 (6/6)     | 0.30-0.91 |
| <b>Overall</b>               | 0.92(23/25)           | 0.75-0.98 | 0.88 (23/26)   | 0.71-0.96 |
